# Supplementary material for: Protective effects of formononetin against rhabdomyolysis-induced acute kidney injury by upregulating Nrf2 in vivo and in vitro
Source: Royal Society of Chemistry journal article supplement (doi:10.1039/c6ra20339f), 2016-01-01
Supplement: c6ra20339f1.pdf [file c6ra20339f1.pdf]

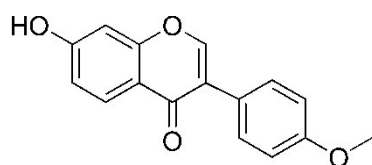

Fig. S1

Supplementary Table 2 The primer sequence of genes used for real-time PCR assay in rats

| Gene           | Forward primer sequence | Reverse primer sequence  |
|----------------|-------------------------|--------------------------|
| <i>Kim-1</i>   | AGAGAGAGCAGGACACAGGCTT  | ACCCGTGGTAGTCCCAAACA     |
| <i>Mrp2</i>    | ATCGCTCACAGGCTGCACAC    | TCAGGACTGCCATACTCGACAATC |
| <i>Mrp4</i>    | AAGTGATAACGGGCATGAGG    | TGAAGGTCACGAACAGGATG     |
| <i>Bax</i>     | AGCGAGTGTCTCAGGCGAAT    | CCGGCCCCAGTTGAAGTT       |
| <i>Bak</i>     | GCAAGTTGCCCAGGACACA     | CCCACCTGACCCAAGACT       |
| $\beta$ -actin | TCGTGCGTGACATTAAGAG     | ATTGCCGATAGTGATGACCT     |

Supplementary Table 3 The information of the antibodies used in the study

| Antibody       | Specificity | Dilutions | Company                         |
|----------------|-------------|-----------|---------------------------------|
| NRF2           | Human, Rat  | 1:1000    | Proteintech group, chicago, USA |
| BCL-2          | Human, Rat  | 1:1000    | Proteintech group, chicago, USA |
| BCL-XL         | Human, Rat  | 1:1000    | Proteintech group, chicago, USA |
| BAX            | Human, Rat  | 1:1000    | Proteintech group, chicago, USA |
| Cytochrome c   | Human, Rat  | 1:1000    | Proteintech group, chicago, USA |
| Caspase-9      | Human, Rat  | 1:1000    | Proteintech group, chicago, USA |
| Caspase-3      | Human, Rat  | 1:1000    | Proteintech group, chicago, USA |
| $\beta$ -actin | Human, Rat  | 1:1000    | Proteintech group, chicago, USA |
